# Supplementary material
Source: publisher figshare collection journal article supplement (https://acs.figshare.com/ndownloader/files/3614232)
Supplement: Supplementary file 1 [file 3614232]

**Electronic Supporting Information for**  
**Carbon Nitride Photocatalysts for Watersplitting; a**  
**Computational Perspective**

Cristina Butchosa, Pierre Guiglion, Martijn A. Zwijnenburg

Department of Chemistry, University College London, 20 Gordon Street, London  
WC1H 0AJ, UK.

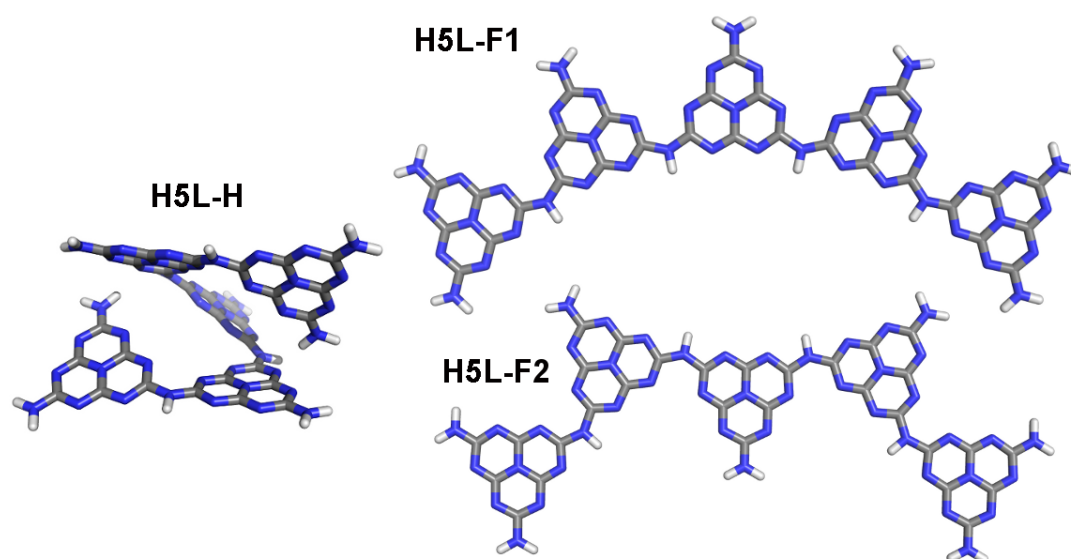

**Fig. S1** DFT optimised geometries of the helical and flat conformers of H5L.

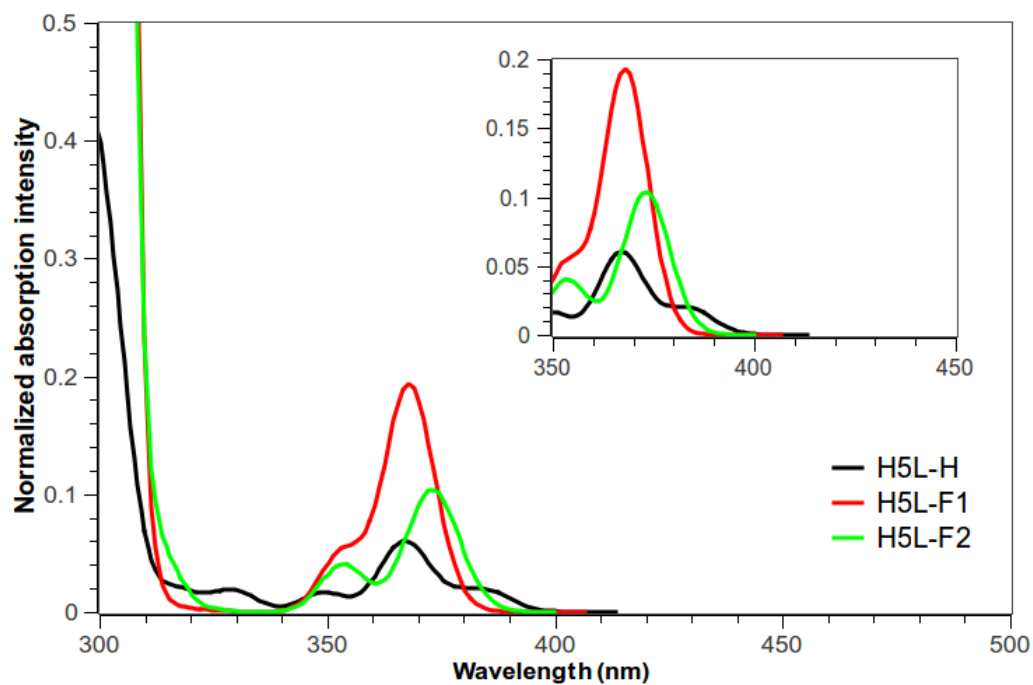

**Fig. S2** Comparison of TD-B3LYP predicted spectra of helical and flat conformers of the H5L cluster model.

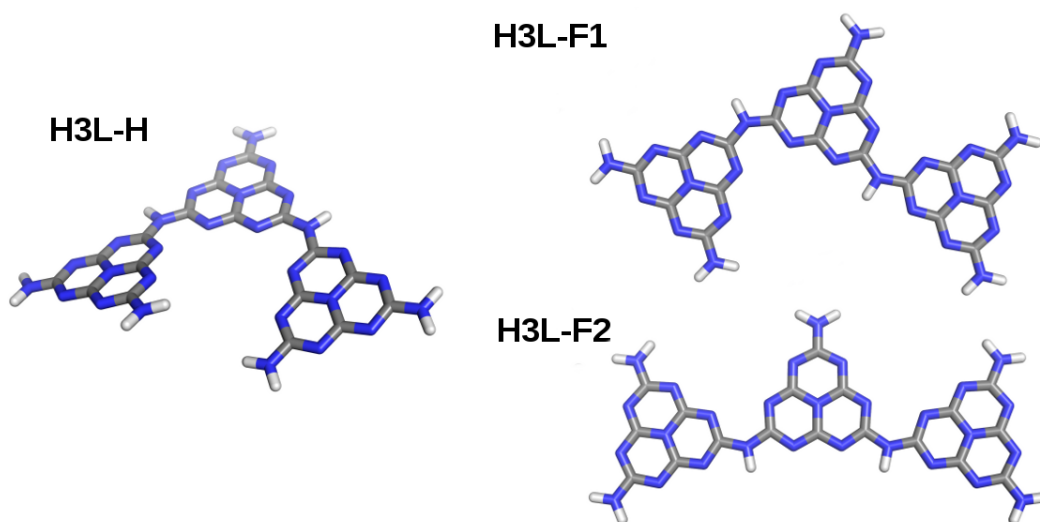

**Fig. S3** DFT optimised geometries of the helical and flat conformers of H3L (H3L-F1 is H3L-F in the main paper).

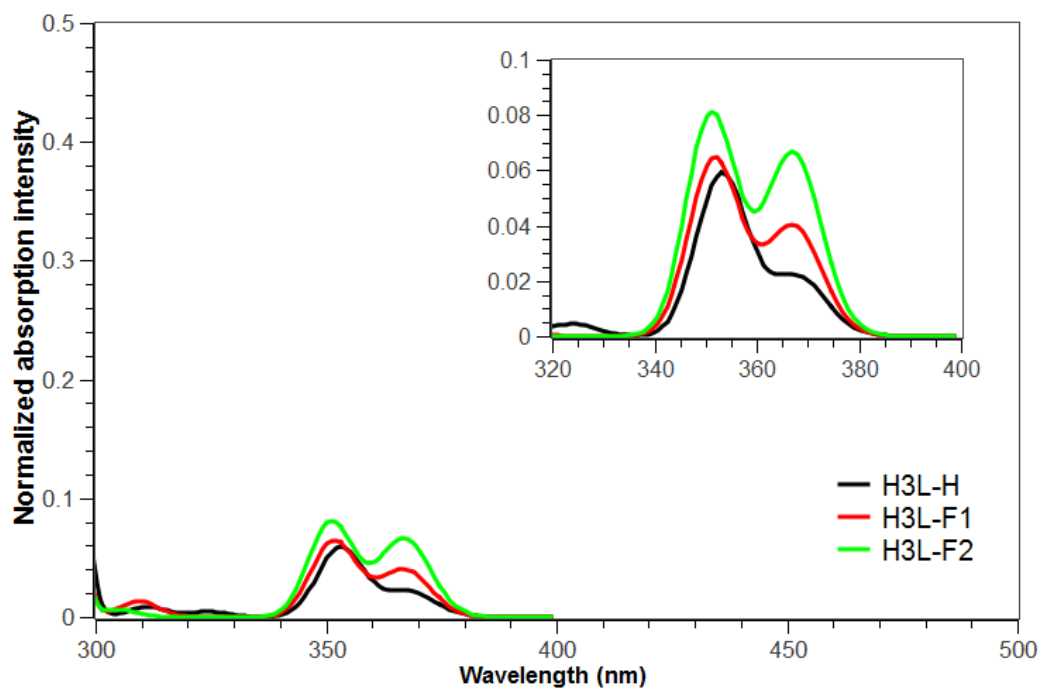

**Fig. S4** Comparison of TD-B3LYP predicted spectra of helical and flat conformers of the H3L cluster model.

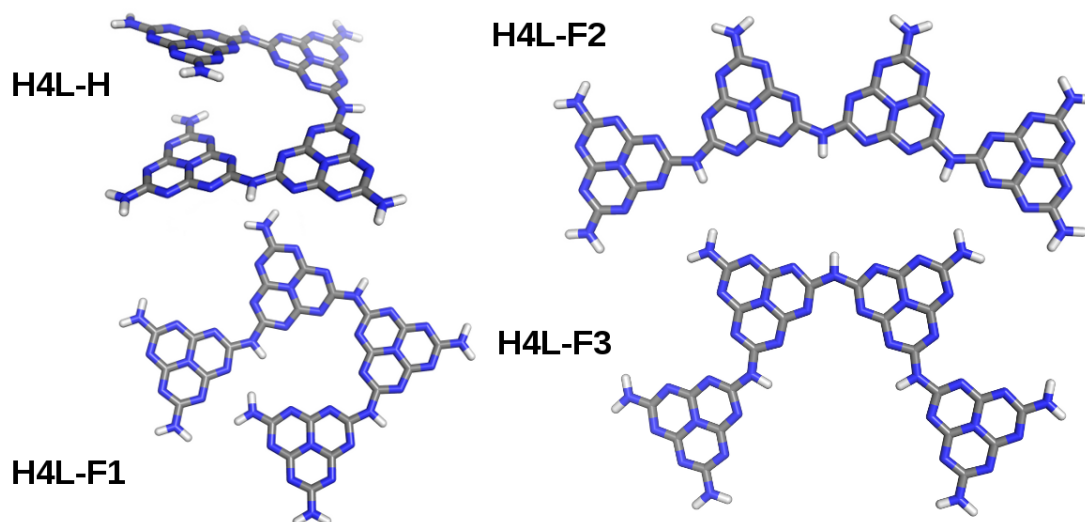

**Fig. S5** DFT optimised geometries of the helical and flat conformers of H4L (H4L-F1 is H4L-F in the main paper).

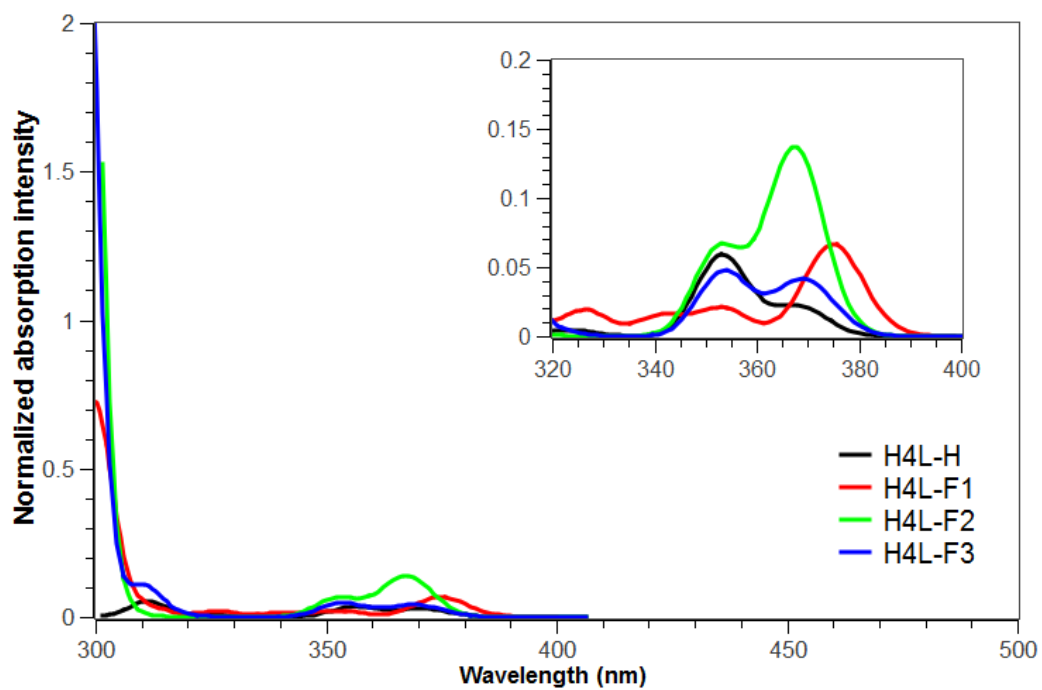

**Fig. S6** Comparison of TD-B3LYP predicted spectra of helical and flat conformers of the H4L cluster model.

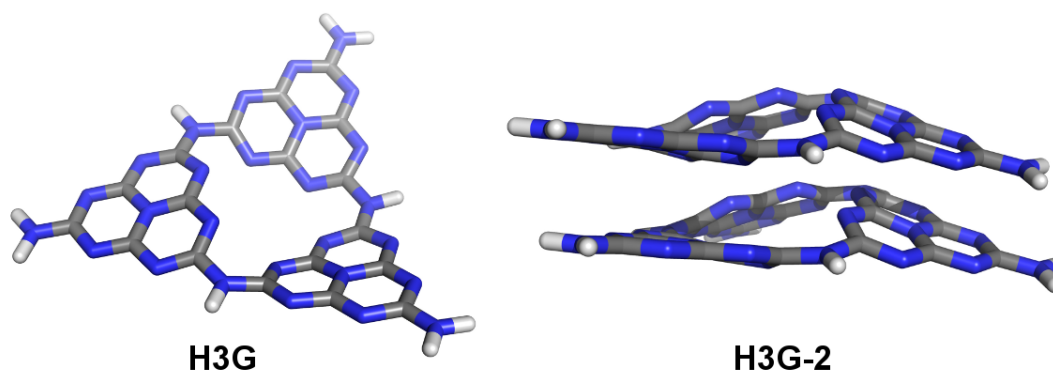

**Fig. S7** Comparison of the DFT optimised geometries of an isolated H3G cluster model and a stack of two.

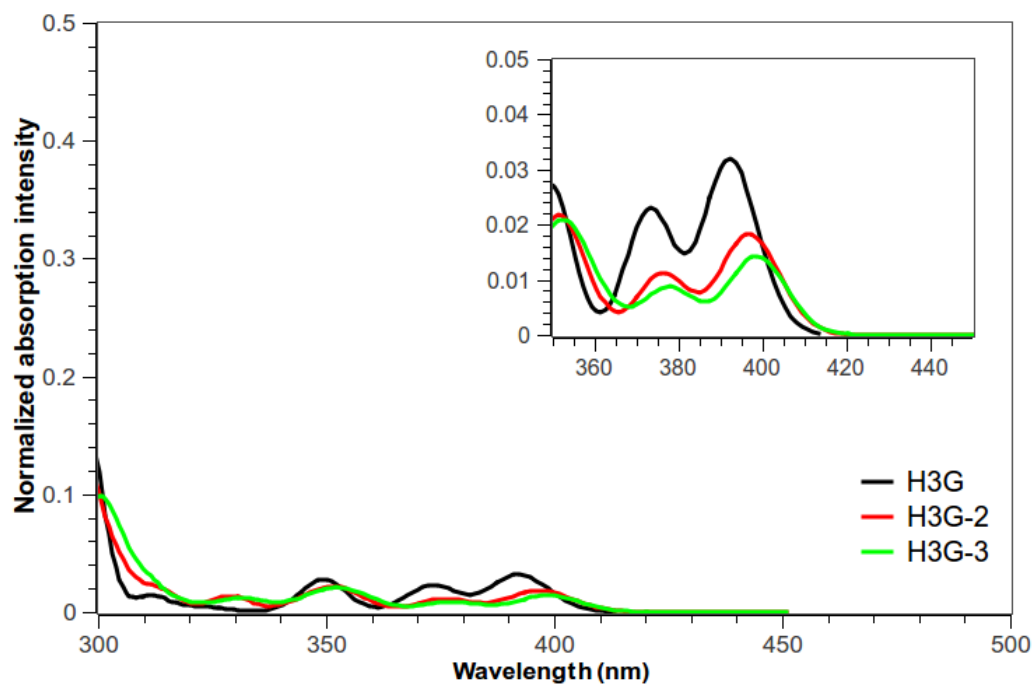

**Fig. S8** Effect of the effect of stacking on the TD-B3LYP predicted spectra of H3G.

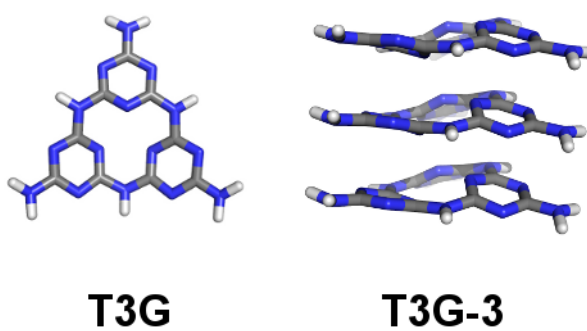

**Fig. S9** Comparison of the DFT optimised geometries of an isolated T3G cluster model and a stack of three.

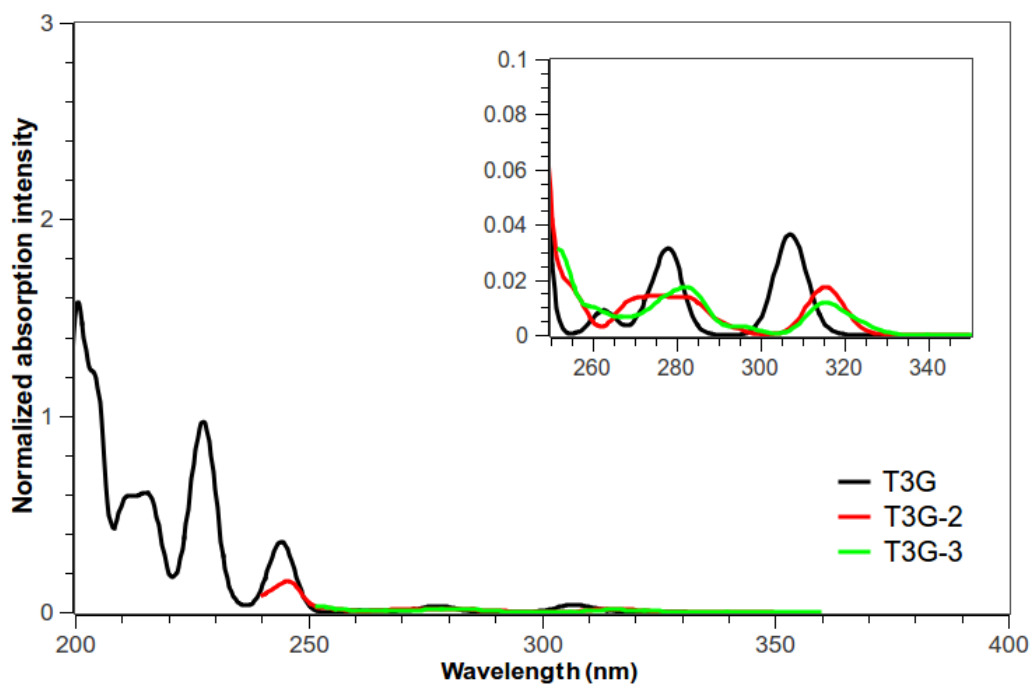

**Fig. S10** Effect of the effect of stacking on the TD-B3LYP predicted spectra of T3G.

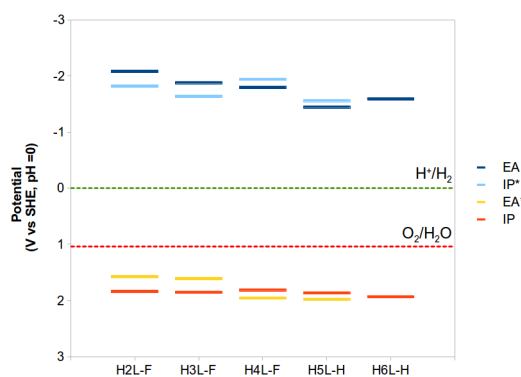

**Fig. S11** (TD-)B3LYP predicted IP, EA, IP\* and EA\* adiabatic potentials of the lowest energy conformers of cluster models of linear heptazine-based structures in water ( $\epsilon = 80.1$ ) at pH 0.

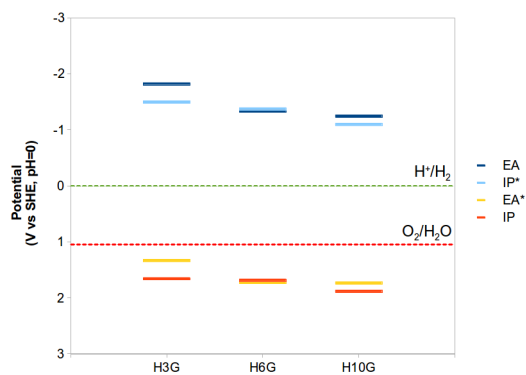

**Fig. S12** (TD-)B3LYP predicted IP, EA, IP\* and EA\* adiabatic potentials of the lowest energy conformers of cluster models of graphitic heptazine-based structures in water ( $\epsilon = 80.1$ ) at pH 0.

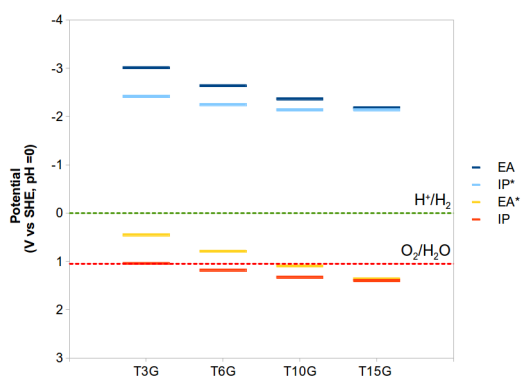

**Fig. S13** (TD-)B3LYP predicted IP, EA, IP\* and EA\* adiabatic potentials of the lowest energy conformers of cluster models of graphitic triazine-based structures in water ( $\epsilon = 80.1$ ) at pH 0.

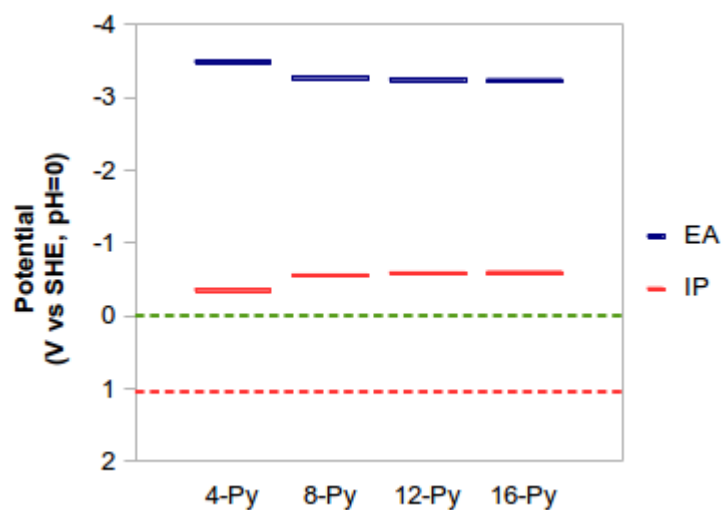

**Fig. S14** Comparison of the alignment of the EA and IP potentials of polypyrrole chains of 4 to 16 pyrrole units in water ( $\epsilon = 80.1$ ) at pH 7.

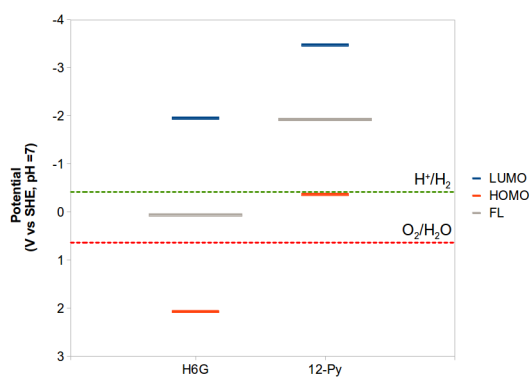

**Fig. S15** Alignment of the top of the valence band (HOMO) and bottom of conduction band (LUMO) of carbon nitride (H6G) and polypyrrole (12-Py) in water ( $\epsilon = 80.1$ ) at pH 7 (Kohn-Sham orbital equivalent of Fig. 16 in the main paper).
